# Supplementary material for: A xestión de regufallos en Izar Estaleiro Fene: aspectos que cómpre considerar para a mellora continua
Source: Royal Society of Chemistry journal article supplement (doi:10.1039/d2an01651f), 2002-01-01
Supplement: d2an01651f1.pdf [file d2an01651f1.pdf]

## Electronic Supporting Material

### **Zinc Pyrovanadate Nanorods with Excellent Peroxidase-like Activity at Physiological pH for Colorimetric Assay of H<sub>2</sub>O<sub>2</sub> and Epinephrine**

**Yaru Liu<sup>a</sup>, Pingping Hao<sup>a</sup>, Zhenchao Liu<sup>a</sup>, Guijiang Li<sup>a,c</sup>, Gaochao Fan<sup>c</sup>, Min  
Xie<sup>b,\*</sup> and Qingyun Liu<sup>a,\*</sup>**

*<sup>a</sup> College of Chemical and Biological Engineering, Shandong University of Science and  
Technology, Qingdao 266590, P R China*

*<sup>b</sup> Community Health Service Center (University Hospital), University of Science and  
Technology Beijing, Beijing 100083, P. R. China*

*<sup>c</sup> Shandong Key Laboratory of Biochemical Analysis, College of Chemistry and  
Molecular Engineering, Qingdao University of Science and Technology, Qingdao  
266042, P R China*

---

**\* Corresponding Author**

E-mail: min66@ustb.edu.cn; qyliu@sdust.edu.cn

Tel: +86 0532 86057757

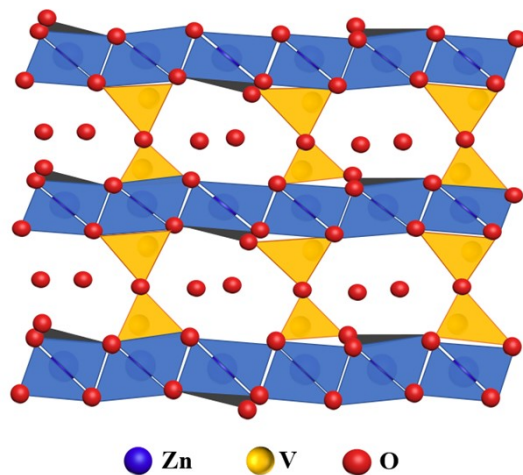

**Fig. S1** Crystal structure of  $\text{Zn}_3\text{V}_2\text{O}_7(\text{OH})_2 \cdot 2\text{H}_2\text{O}$ .

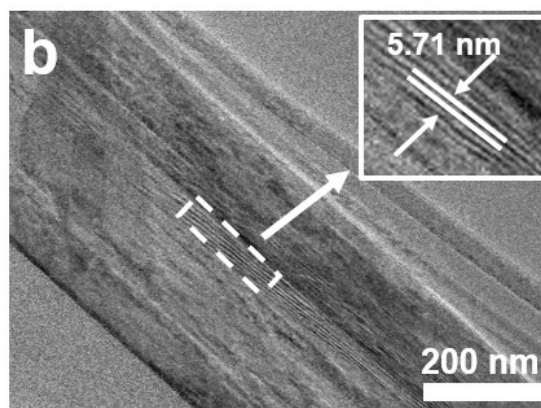

**Fig. S2** TEM images of  $\text{Zn}_3\text{V}_2\text{O}_7(\text{OH})_2 \cdot 2\text{H}_2\text{O}$  nanorods.

**Table S1** Comparison of kinetic parameters ( $K_m$  and  $V_{max}$ ) at physiological pH.

| Nanozymes                                                                | $K_m/\text{mM}$ |                        | $V_{max}/10^{-8} \text{ Ms}^{-1}$ |                        | Ref.      |
|--------------------------------------------------------------------------|-----------------|------------------------|-----------------------------------|------------------------|-----------|
|                                                                          | TMB             | $\text{H}_2\text{O}_2$ | TMB                               | $\text{H}_2\text{O}_2$ |           |
| Au-NCs+ ZIF-8/CQDs+ heparin                                              | 2.93            | 36.28                  | 10.53                             | 3.13                   | 1         |
| Cu/Fe <sub>3</sub> O <sub>4</sub> @FeOOH                                 | 1.369           | 1.087                  | 5.61                              | 5.66                   | 2         |
| GO-AuNCs                                                                 | 0.16            | 142.39                 | -                                 | -                      | 3         |
| Pt@CNNS                                                                  | 0.37            | -                      | 3.2                               | -                      | 4         |
| $\text{Zn}_3\text{V}_2\text{O}_7(\text{OH})_2 \cdot 2\text{H}_2\text{O}$ | 0.859           | 2.005                  | 17.51                             | 9.98                   | This work |

- 1 F. Ran, Y. Xu, M. Ma, X. Liu and H. Zhang, *Talanta*, 2022, **250**, 123702.
- 2 Y. Huang, G. Liang, T. Lin, L. Hou, F. Ye and S. Zhao, *Anal Bioanal Chem*, 2019, **411**, 3801-3810.
- 3 Y. Tao, Y. Lin, Z. Huang, J. Ren and X. Qu, *Adv Mater*, 2013, **25**, 2594-2599.
- 4 X. Li, X. Li, Q. Chen, J. Chen and P. Wu, *Chem Commun (Camb)*, 2022, **58**, 6930-6933.
